# Supplementary material
Source: PubMed Central journal article supplement (PMC2775813)

**A**

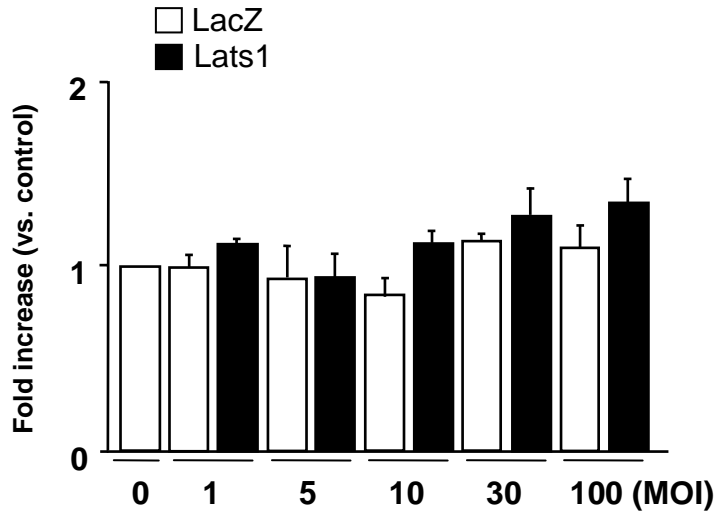

**B**

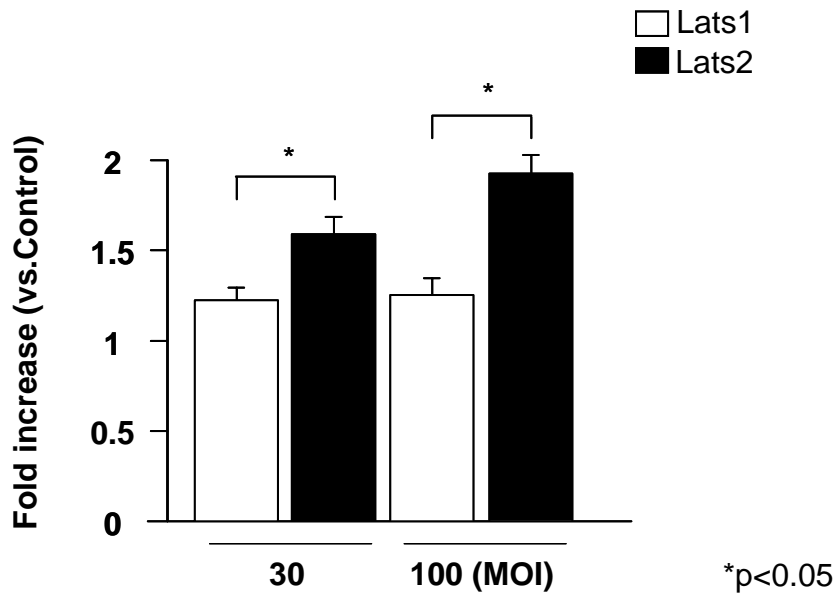

**A**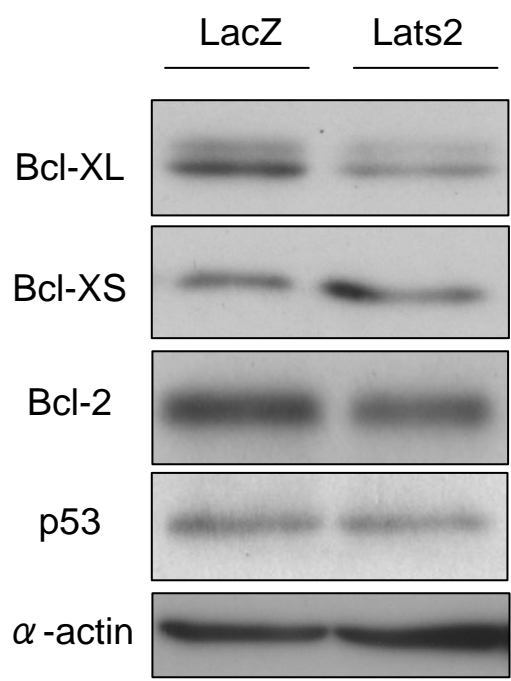**B**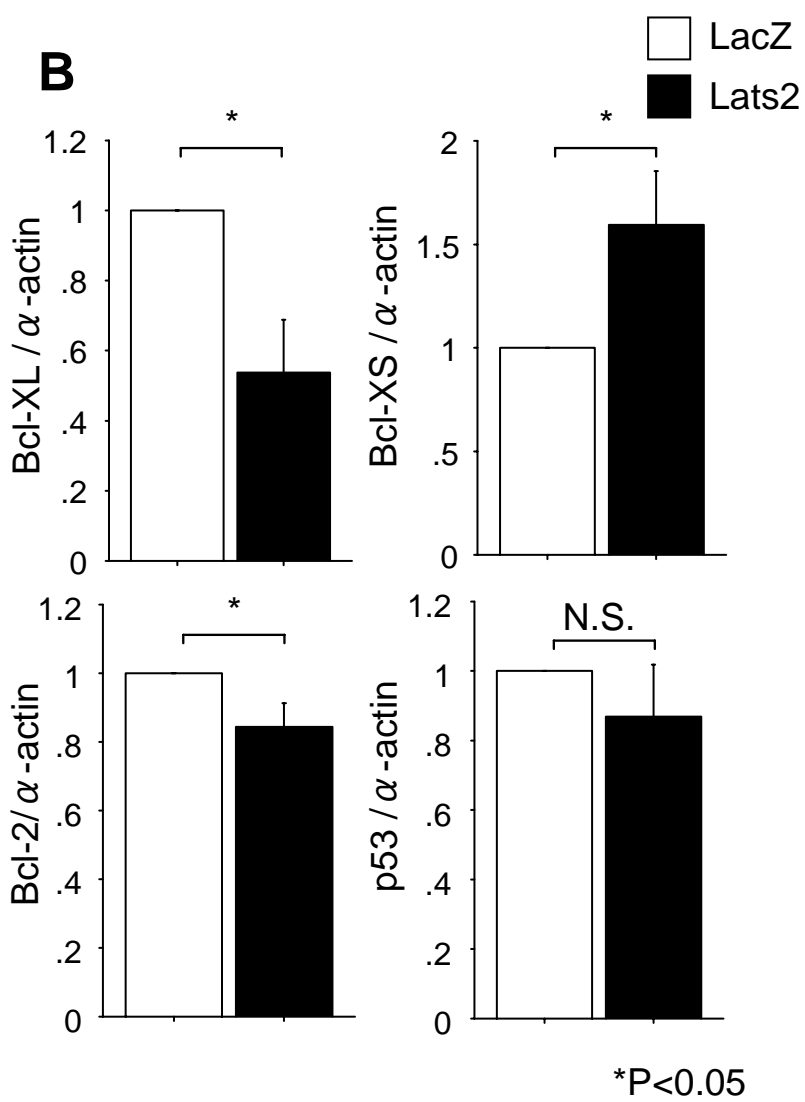

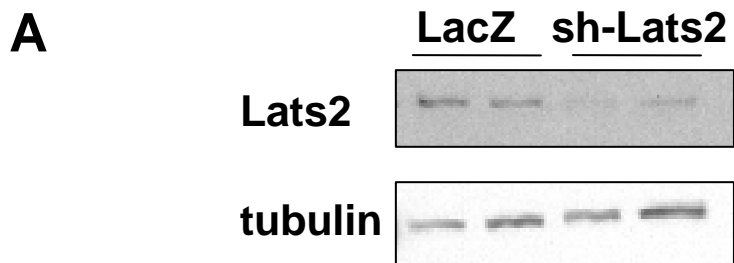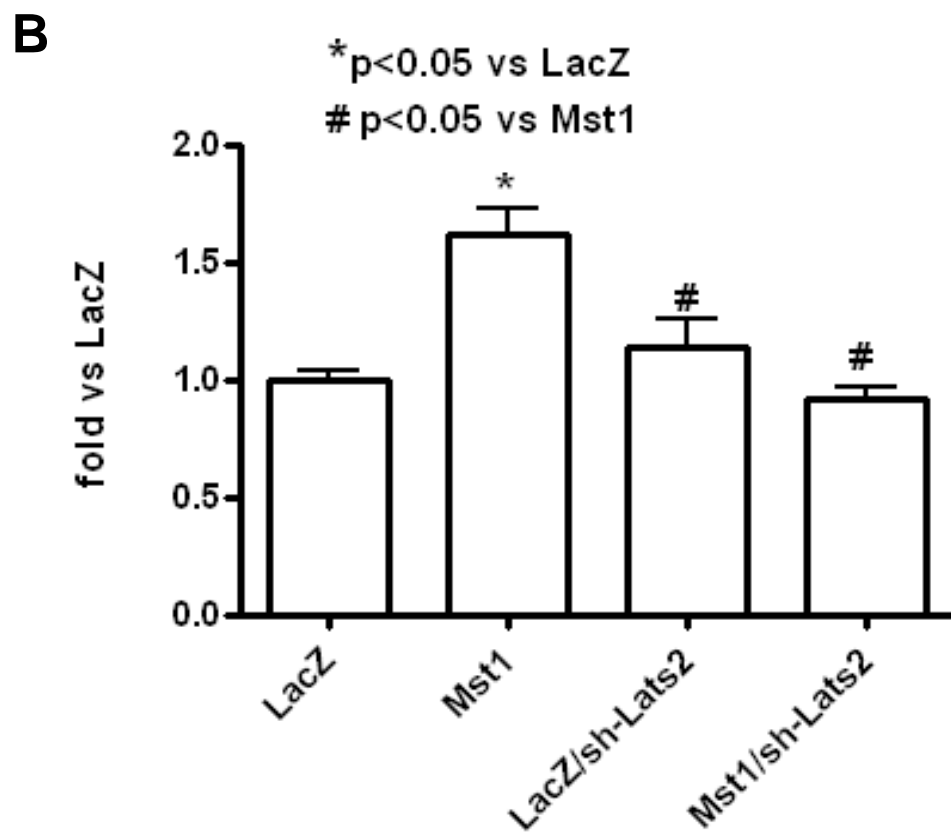

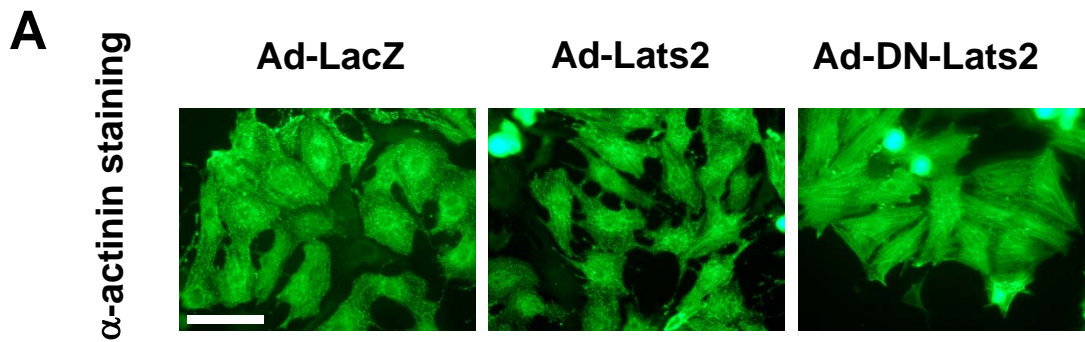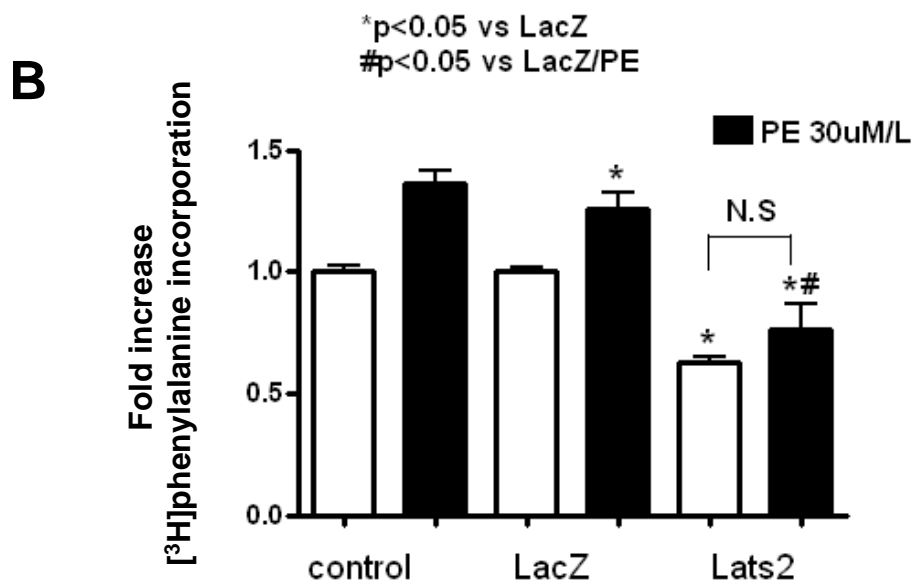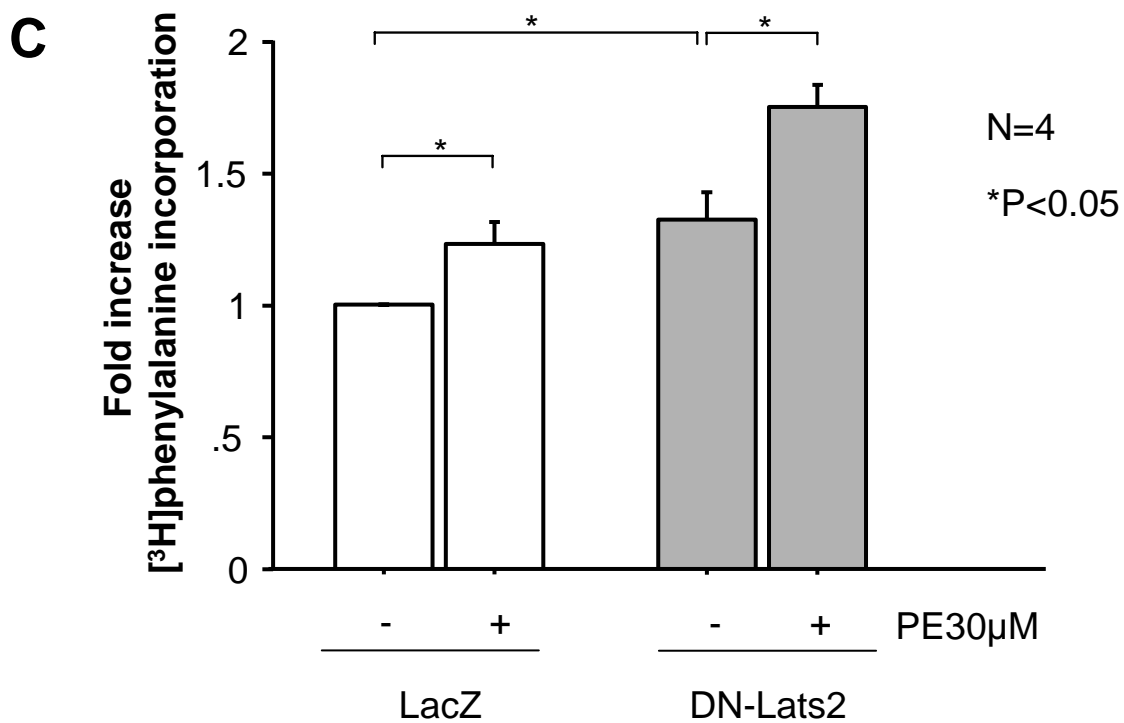

**A**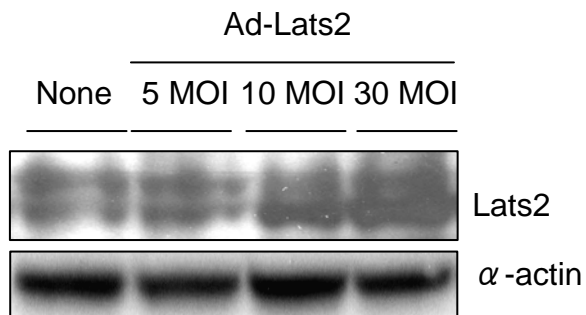**B**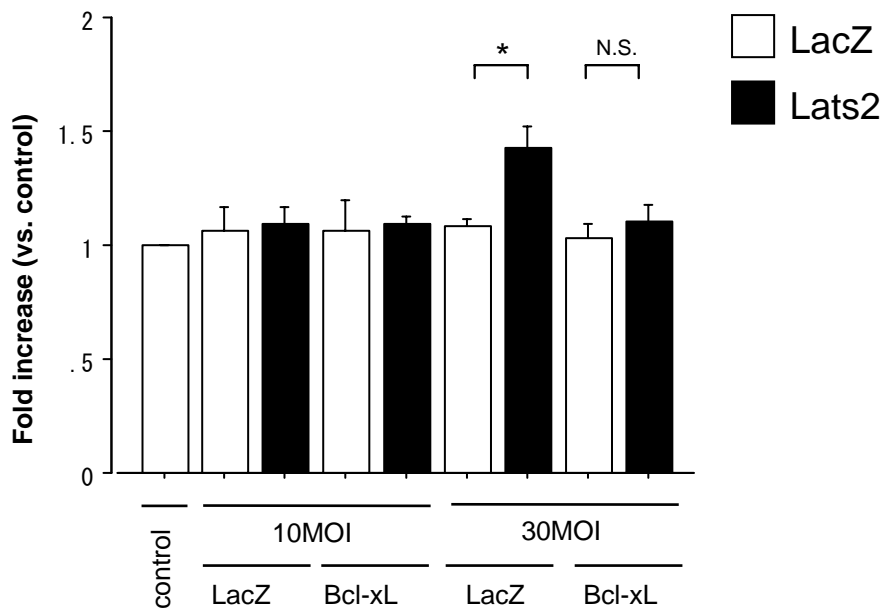**C**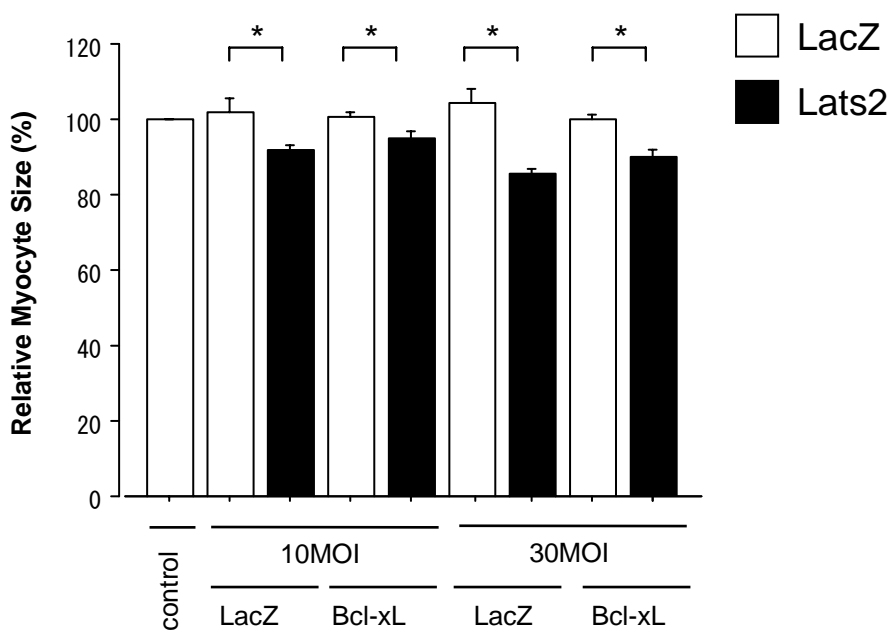

N=4

\*P&lt;0.05

**A**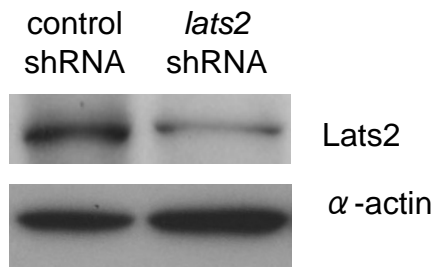**B**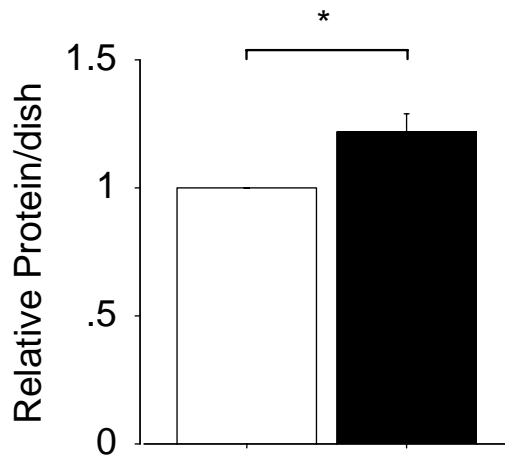**C**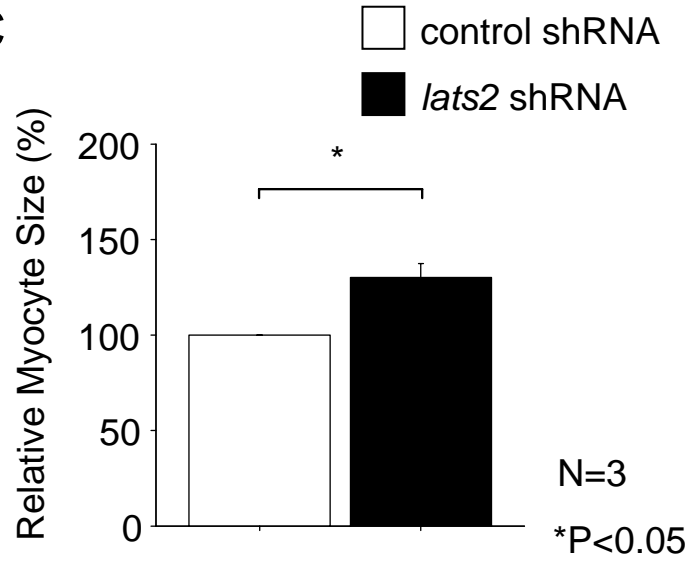**D**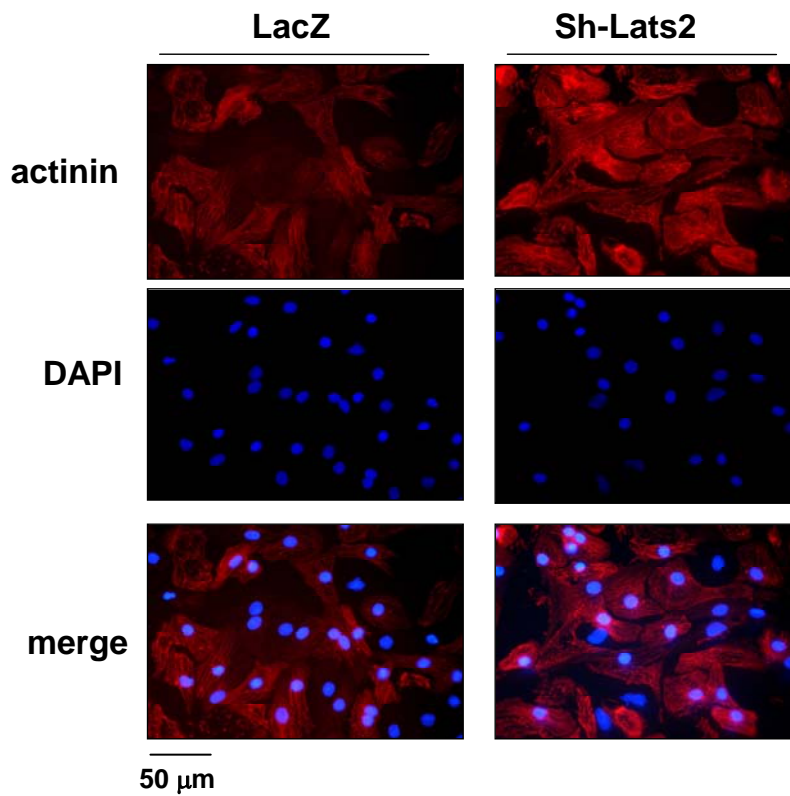

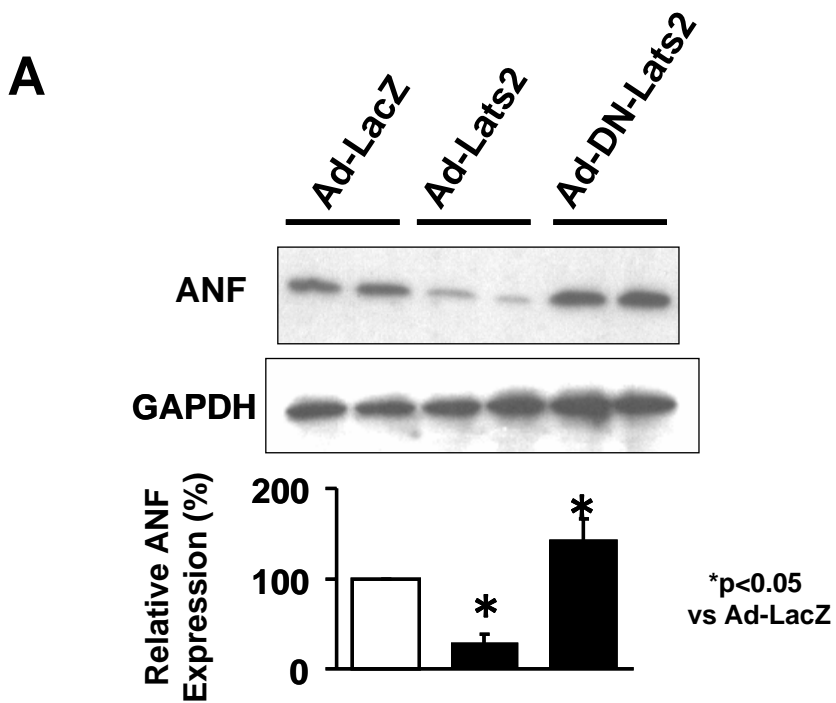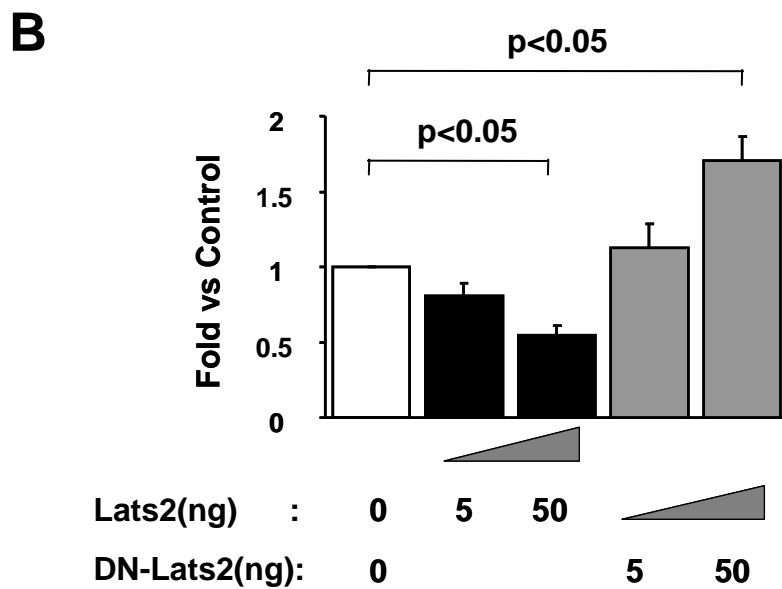

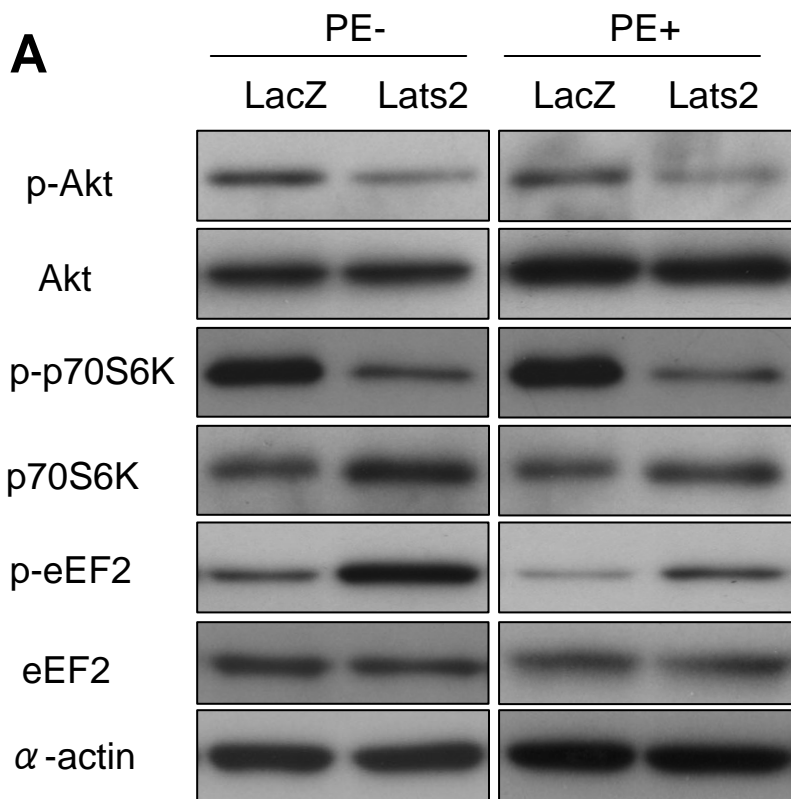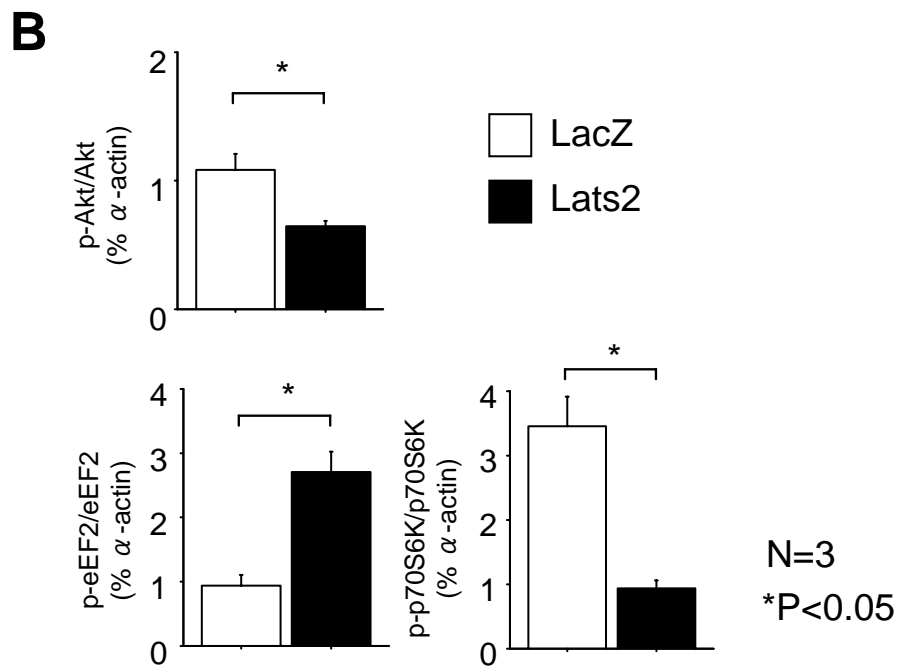



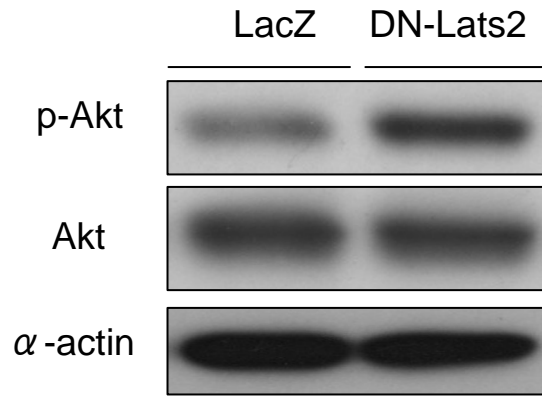

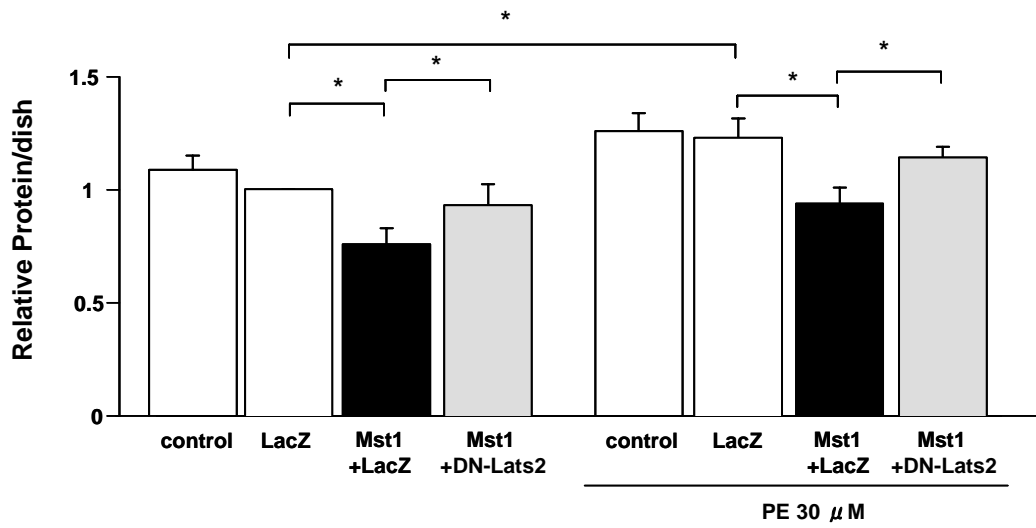

Times after birth

1 day 1 week 2 weeks 4 weeks 6 weeks 8 weeks

Lats2

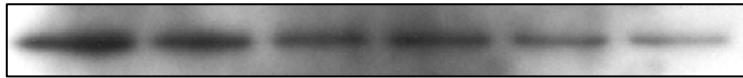

$\alpha$ -actin

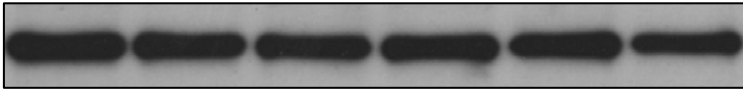

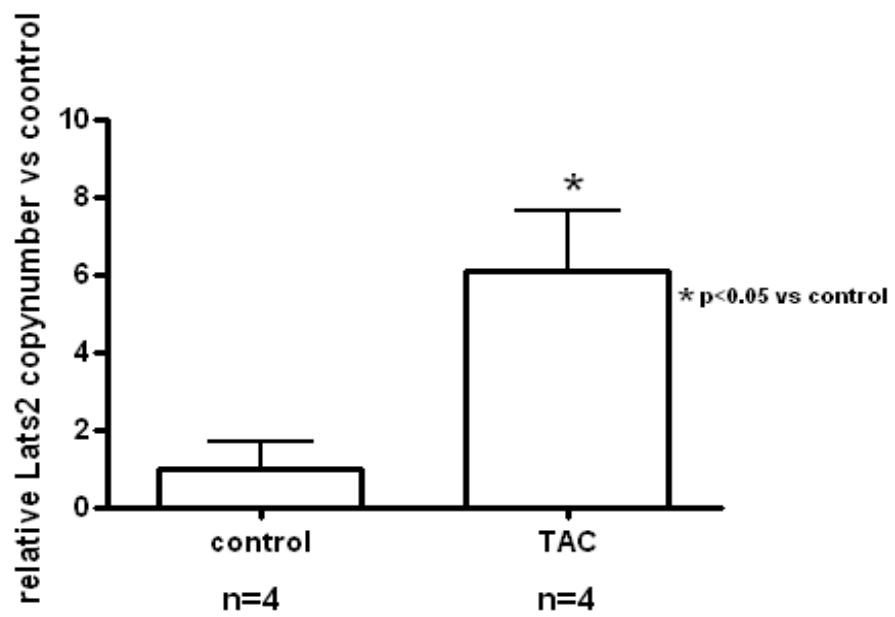

**NTg**

**Tg-Lats2**

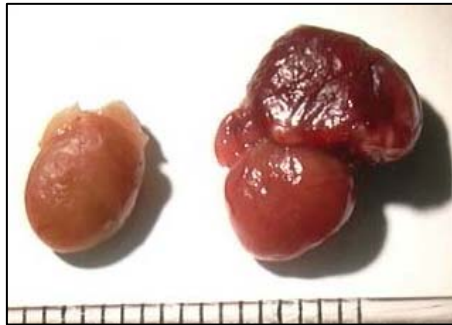

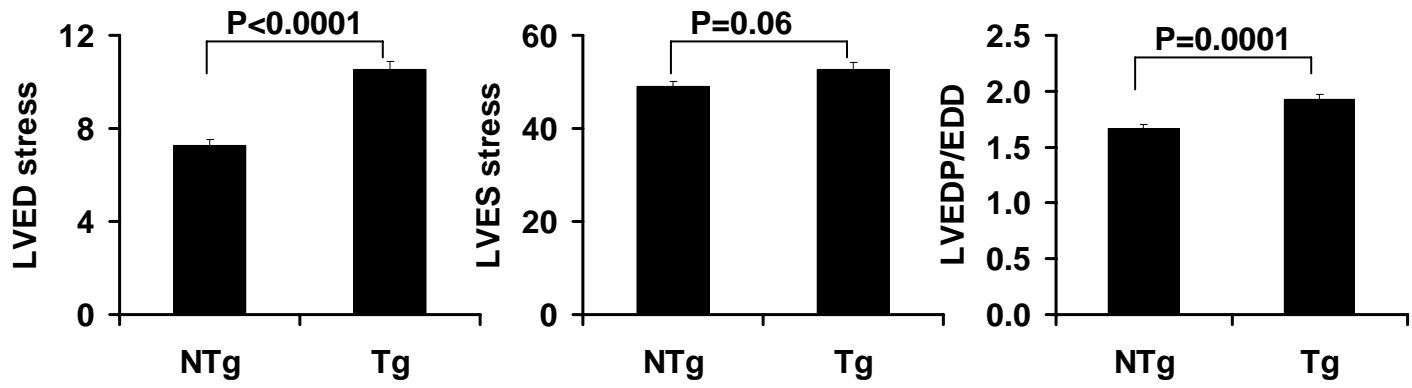

**A**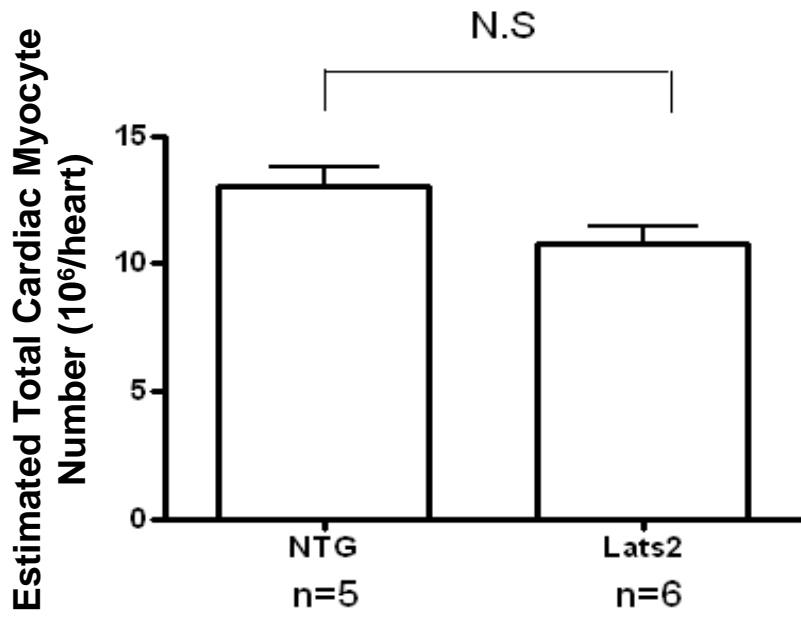**B**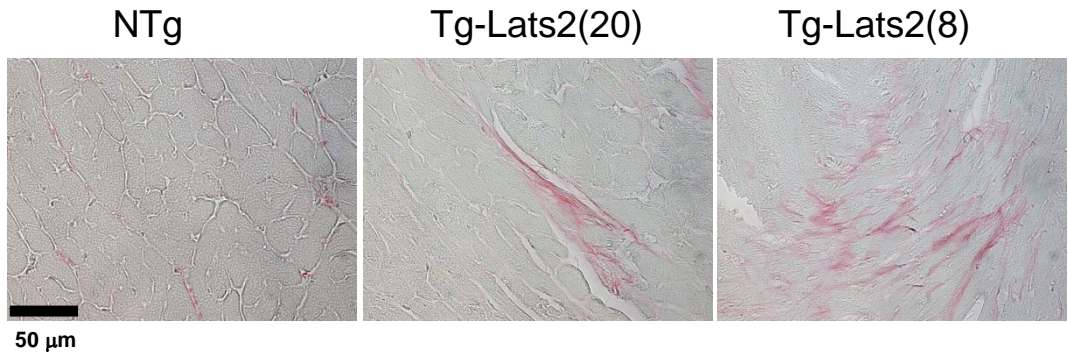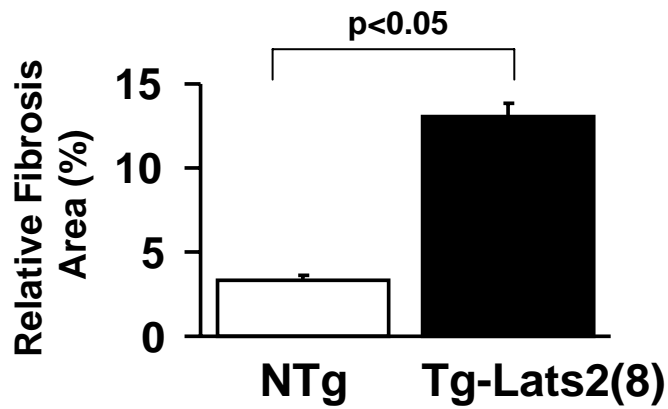

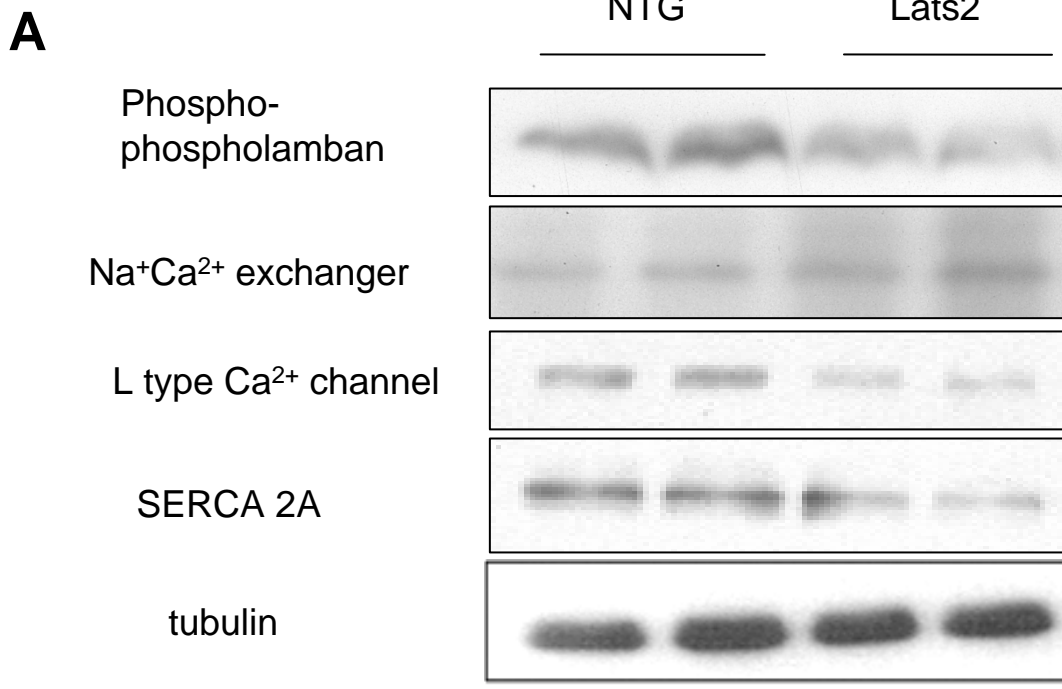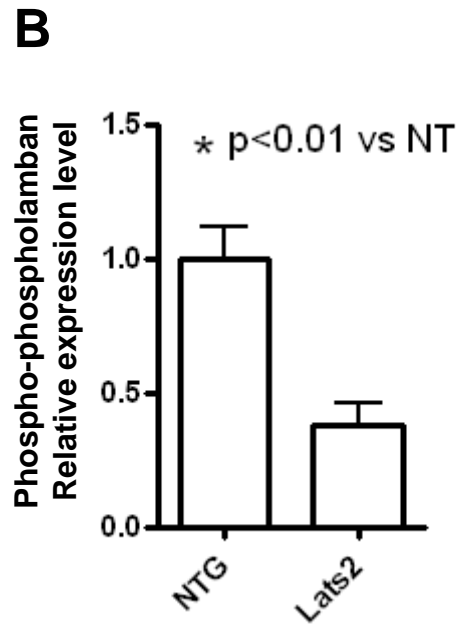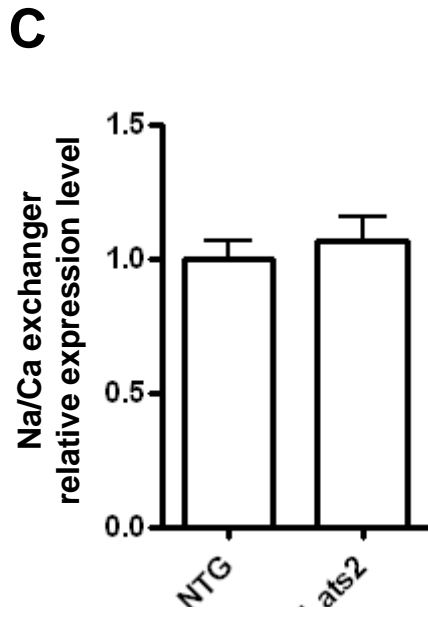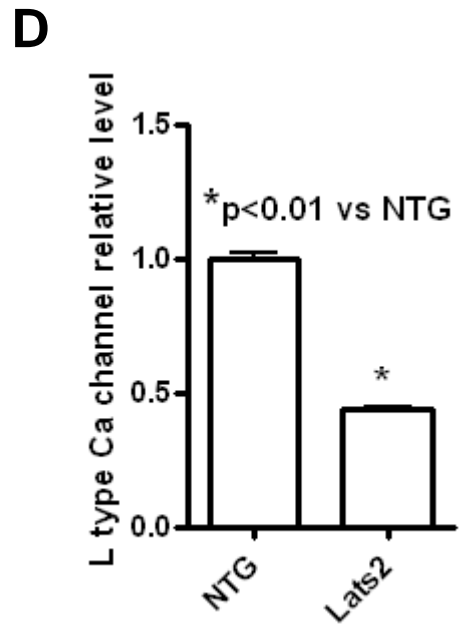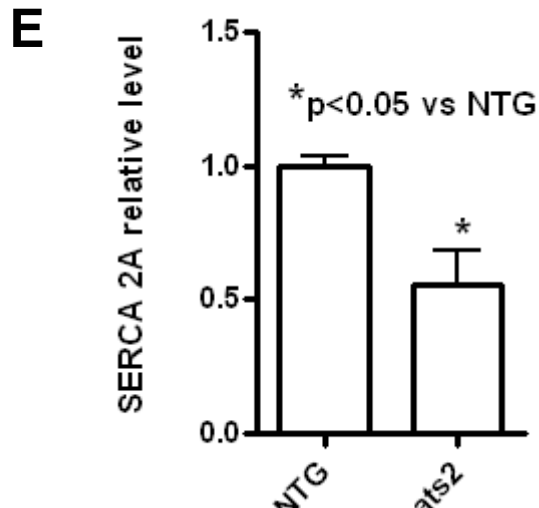



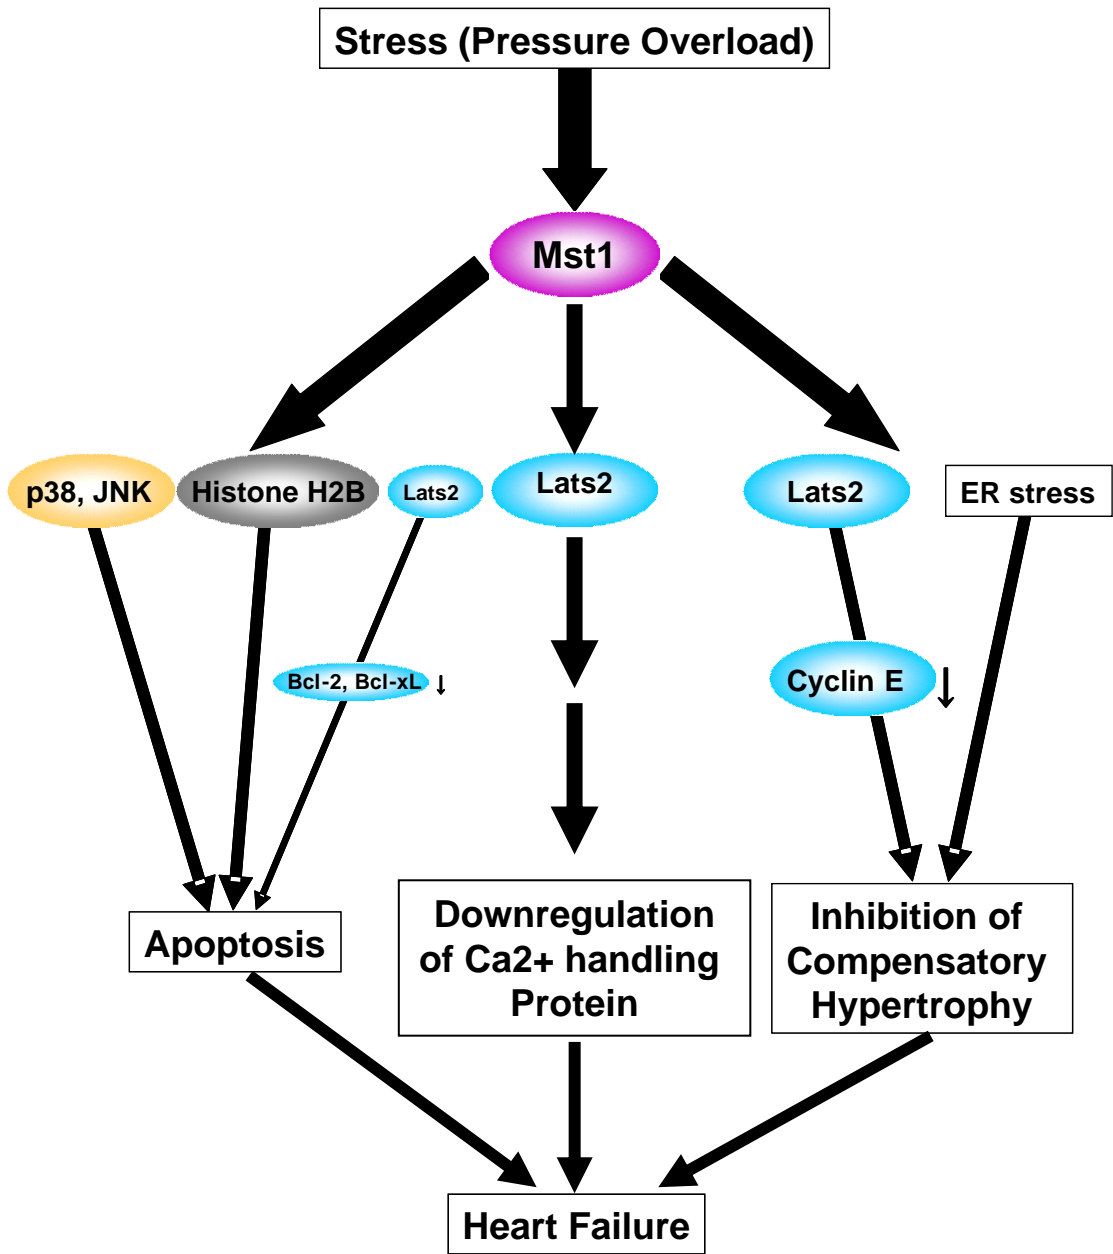

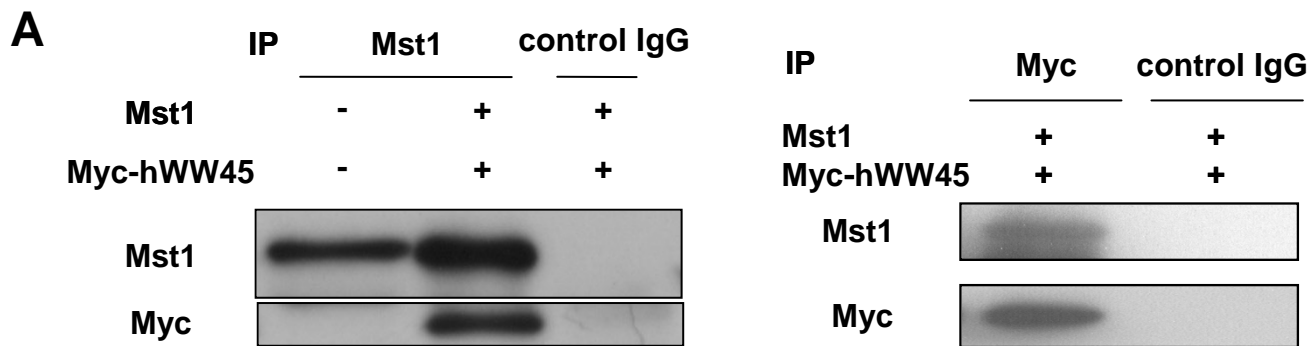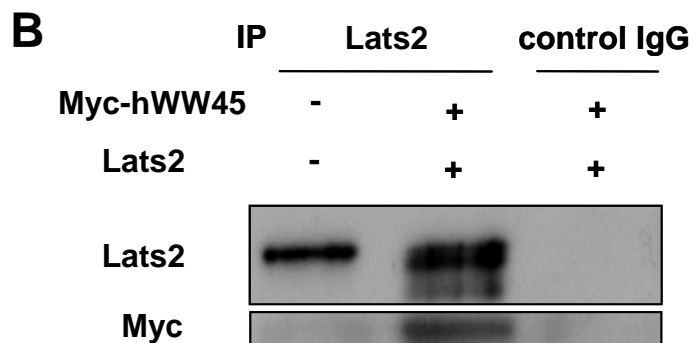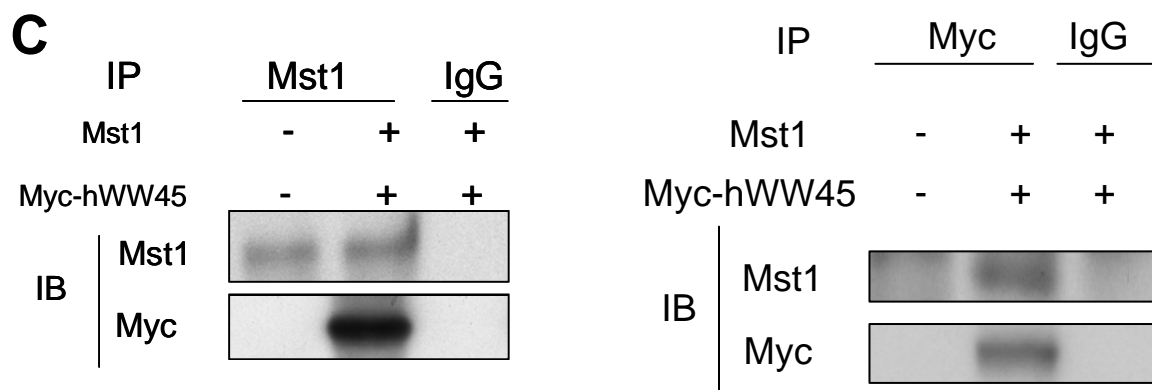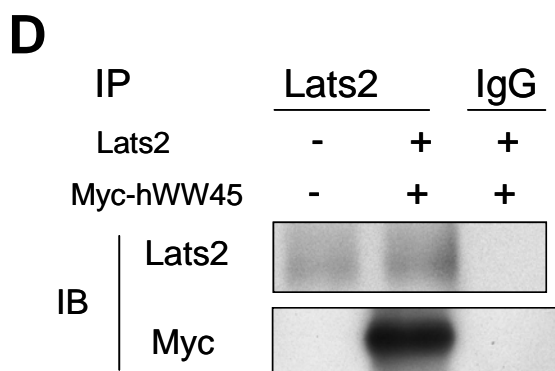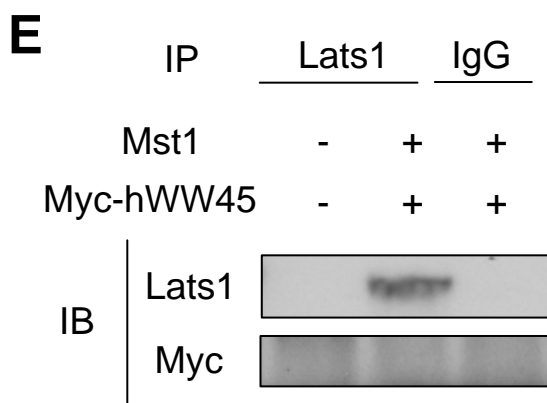

**A**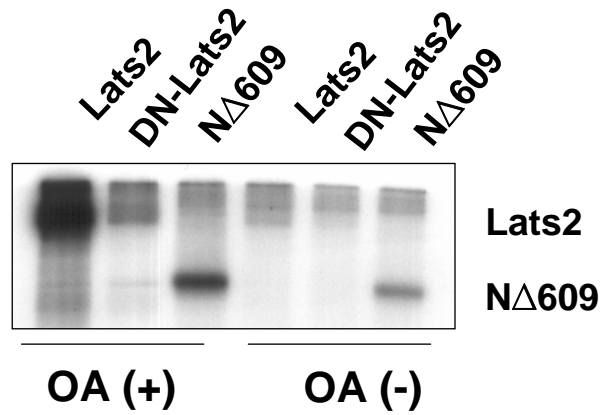**B**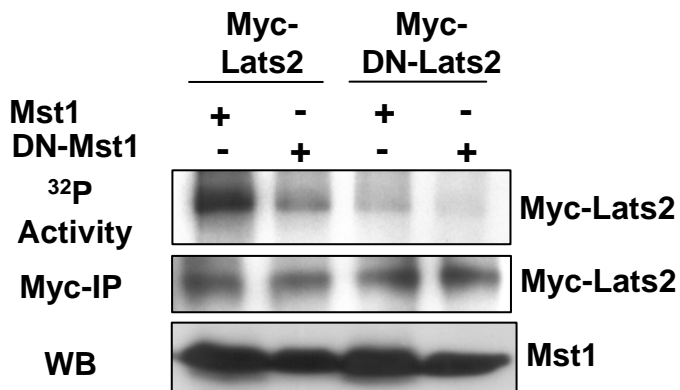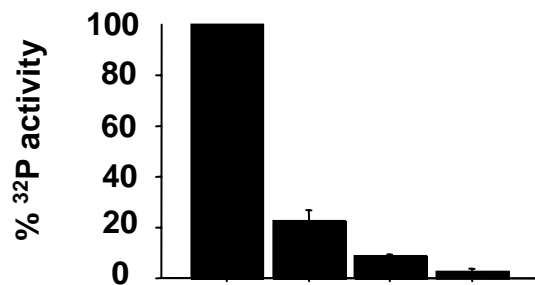**C**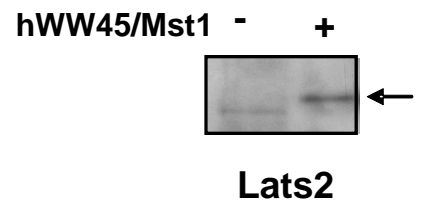

**A**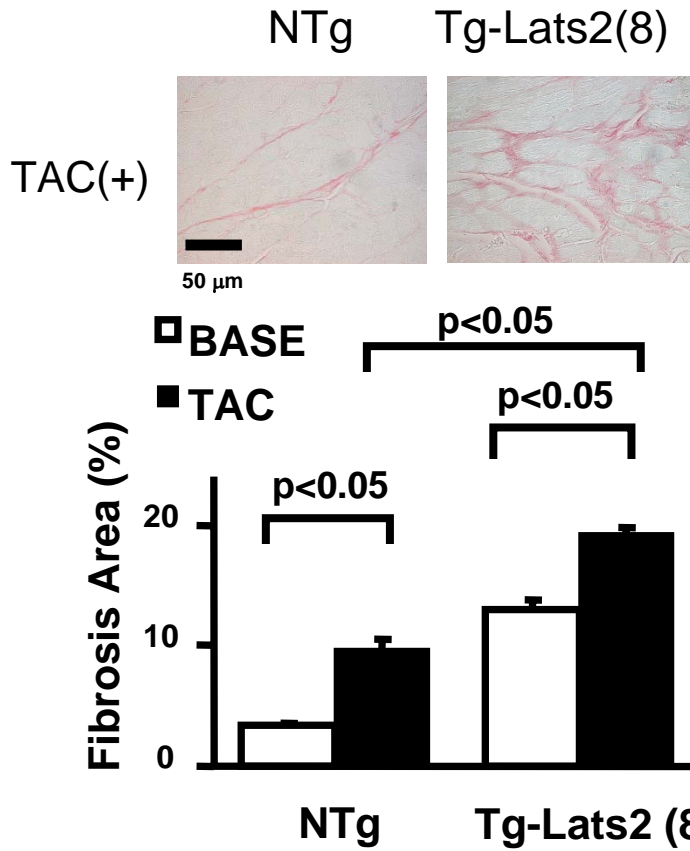**B**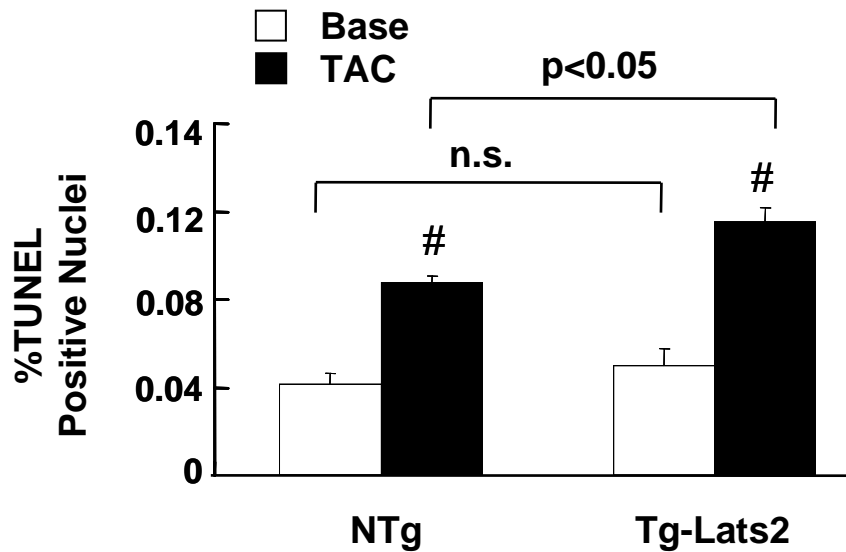

**A**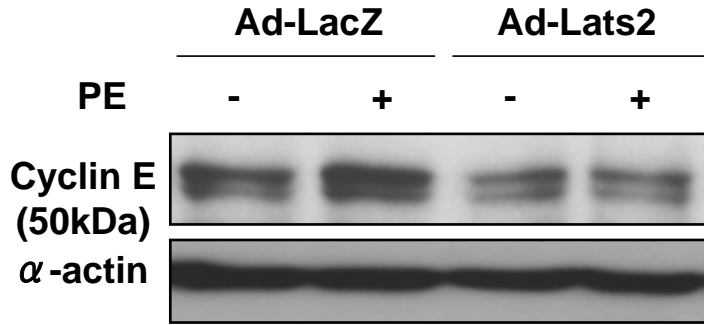**B**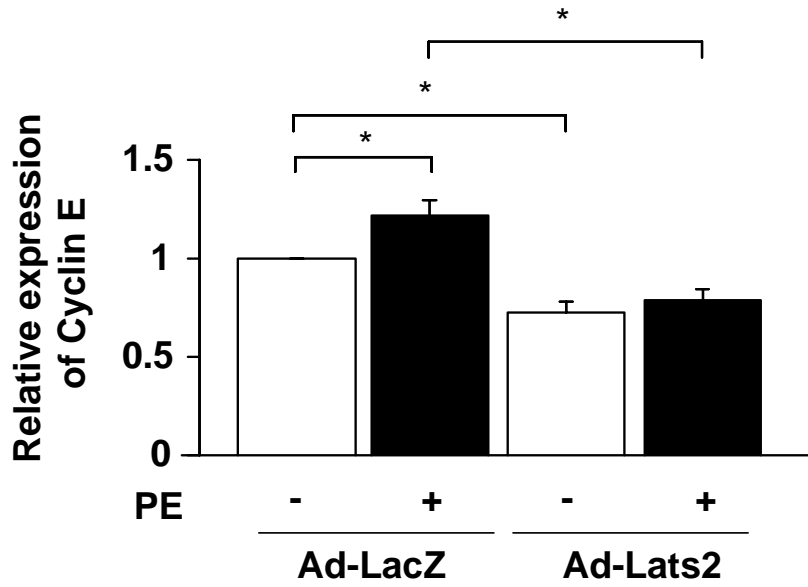

Supplement: NIHMS126732-supplement-supplement_Figures.pdf [file NIHMS126732-supplement-supplement_Figures.pdf]
